# Supplementary material for: A systematic review and meta-analysis of randomized controlled trials of palliative care for pain among Chinese adults with cancer
Source: PubMed Central journal article supplement (PMC6688327; doi:10.1186/s12904-019-0456-z), 2019-08-08
Supplement: 12904_2019_456_MOESM1_ESM.pdf [file 12904_2019_456_MOESM1_ESM.pdf]

Additional file 1 Search strategies for all databases

| Database                 | Search strategy                                                                                                                                                                                                                                                                                                                                                                                                              |
|--------------------------|------------------------------------------------------------------------------------------------------------------------------------------------------------------------------------------------------------------------------------------------------------------------------------------------------------------------------------------------------------------------------------------------------------------------------|
| Medline /PubMed          | (palliative care[MeSH Terms] OR hospice care[MeSH Terms] OR terminal care[MeSH Terms]) AND (neoplasms[MeSH Terms] OR cancer [Title/Abstract] OR neoplasms[Title/Abstract] OR oncology[Title/Abstract]) AND (China[MeSH Terms] OR China or Chinese or Mainland China [Title/Abstract]) And (randomized[Title/Abstract] OR random[Title/Abstract] OR control[Title/Abstract] OR randomly[Title/Abstract]) AND pain [Text word] |
| SCIE                     | TS=(“palliative care” OR “hospice care” OR “terminal care”) AND (TS=neoplasms OR TS=oncology OR TI=cancer OR TI=neoplasms OR TI=oncology) AND (TS=China OR TS=Chinese OR TI=China OR TI=Chinese) AND (TS=random OR TI=randomized OR TI=control OR TI=randomly)                                                                                                                                                               |
| EBSCO                    | <b>S1</b> SU palliative care OR SU hospice care OR TI palliative care OR TI hospice care AND TX ( "random allocation" OR "randomized controlled trial*" OR "controlled clinical trial*" )<br><b>S2</b> TI China OR TI Chinese OR AB China OR AB Chinese<br><b>S3</b> TI cancer OR TI neoplasms OR TI oncology<br><b>S4 S1 AND S2 AND S3</b>                                                                                  |
| CNKI/CBM/<br>Vip/Wanfang | <b>#1</b> SU=随机 OR SU=随机分配 OR SU=随机对照 OR SU=对照 OR SU=随机对照试验 OR SU=随机对照研究 OR AB=随机 (模糊匹配)<br><b>#2</b> SU=临终挂怀 OR SU=安宁 OR SU=舒缓 OR TI=临终关怀 (模糊匹配)<br><b>#3</b> SU=癌症 OR SU=肿瘤 OR TI=癌 OR TI=肿瘤 AND AB=疼 (模糊匹配)<br><b>#4 #1 AND #2 AND #3</b>                                                                                                                                                                                 |

Abbreviations: CNKI, China National Knowledge Infrastructure; CBM, Chinese Biomedical Literature Database.
