# Supplementary material for: A systematic review and meta-analysis of randomized controlled trials of palliative care for pain among Chinese adults with cancer
Source: PubMed Central journal article supplement (PMC6688327; doi:10.1186/s12904-019-0456-z), 2019-08-08
Supplement: 12904_2019_456_MOESM2_ESM.pdf [file 12904_2019_456_MOESM2_ESM.pdf]

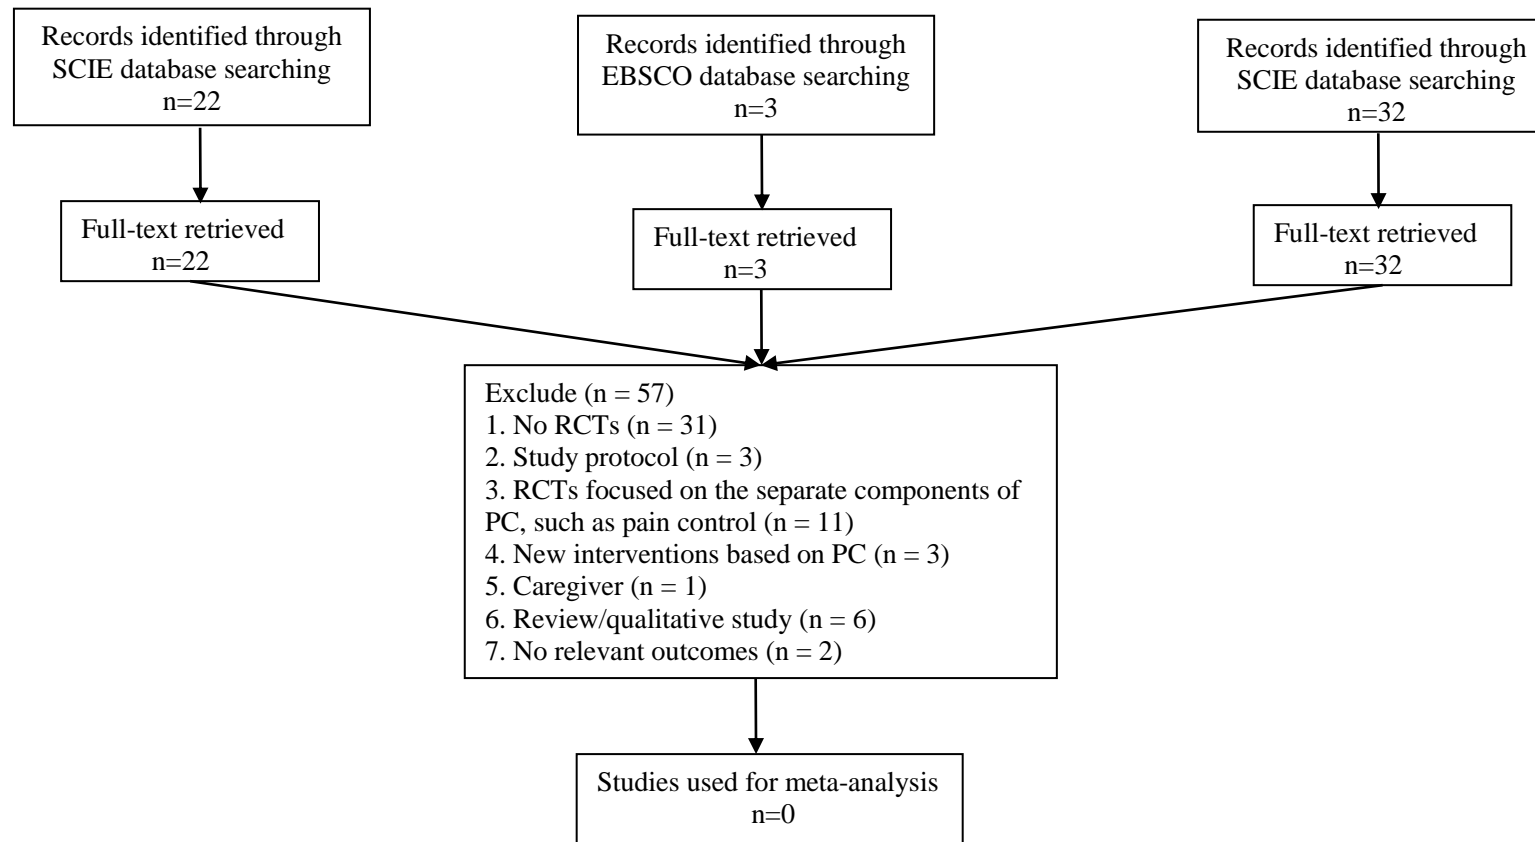

**Additional file 2** Selection process of studies for the meta-analysis (international databases)

Abbreviations: RCTs, randomized controlled trials; PC, palliative care.
